# Synthetic soil crusts against green-desert transitions: a spatial model

Blai Vidiella<sup>1,2</sup>, Josep Sardanyés<sup>3,4</sup>, Ricard V. Solé<sup>1,2,5</sup>,

<sup>1</sup>*ICREA-Complex Systems Lab, Universitat Pompeu Fabra, 08003 Barcelona,*

<sup>2</sup>*Institut de Biologia Evolutiva (CSIC-UPF), Psg. Maritim Barceloneta, 37, 08003 Barcelona*

<sup>3</sup>*Centre de Recerca Matemàtica and* <sup>4</sup>*Barcelona Graduate School of Mathematics (BGSMath). Edifici C, Campus de Bellaterra 08193, Bellaterra, Barcelona and*

<sup>5</sup>*Santa Fe Institute, 1399 Hyde Park Road, Santa Fe NM 87501, USA*

Semiarid ecosystems are threatened by global warming due to longer dehydration times and increasing soil degradation. Mounting evidences indicate that, given the current trends, drylands are likely to expand and possibly experience catastrophic shifts from vegetated to desert states. Here we explore a recent suggestion based on the concept of ecosystem terraformation, where a synthetic organism is used to counterbalance some of the nonlinear effects causing the presence of such tipping points. Using an explicit spatial model incorporating facilitation and considering a simplification of states found in semiarid ecosystems i.e., vegetation, fertile and desert soil, we investigate how engineered microorganisms can shape the fate of these ecosystems. Specifically, two different, but complementary, terraformation strategies are proposed: *Cooperation*-based: *C*-terraformation; and *Dispersion*-based: *D*-terraformation. The first strategy involves the use of soil synthetic microorganisms to introduce cooperative loops (facilitation) with the vegetation. The second one involves the introduction of engineered microorganisms improving their dispersal capacity, thus facilitating the transition from desert to fertile soil. We show that small modifications enhancing cooperative loops can effectively change the location of the critical transition found at increasing soil degradation rates, also identifying a stronger protection against soil degradation by using the *D*-terraformation strategy. The same results are found in a mean field model providing insights into the transitions and dynamics tied to these terraformation strategies. The potential consequences and extensions of these models are discussed.

## I. INTRODUCTION

Global warming is changing the dynamics and resilience of ecosystems, damaging many of them and creating the conditions for widespread diversity loss [2, 34, 35]. Because of the presence of nonlinear effects, many ecosystems display so called tipping points associated to community collapse. Among these systems, drylands (which comprise arid, semi-arid and dry-subhumid ecosystems) are a specially fragile subset of major importance: they include more than 40% of terrestrial ecosystems and host a similar percentage of the current human population [31]. Increasing aridity is pushing these ecosystems towards serious declines in microbial diversity, land degradation, loss of multifunctionality as a desert state is approached [23, 31]. Dedicated efforts have been addressing several avenues to both understanding how transitions can be anticipated by means of warning signals [16, 18, 39, 45] and even prevented [31, 40, 46].

Drylands are characterised by the presence of organisms that have adapted to low moisture availability, damaging UV radiation and high temperatures [29]. A rich community structure and the maintenance of physical soil coherence are essential to prevent drylands from degradation. In this context, some universal types of interactions that occur among species in arid habitats inevitably lead to breakpoints associated to the existence of multiple alternative states, identified in field data [4]. A well known class of these interactions takes place among vascular plants and is known as *facilitation* [5, 7, 48], i.e. non-trophic interactions between individuals mediated

through changes in the abiotic environment or through other organisms favouring individual growth and reproduction [8, 9, 36].

A common outcome of facilitation is the emergence of spatial patchiness (see Fig. 1(a-b)). Such patterns are often remarkably organised in space [19]. These transitions can be sometimes observed in the same landscape under the presence of environmental gradients [5]. In this context it has been conjectured [17, 18] that spatial correlations can be used as indicators of forthcoming green-desert shifts [16]. The presence of catastrophic transitions deeply modifies our perception of risks associated to climate change and land degradation. Once a critical state is approached, unstoppable runaway processes are unleashed [38]. Despite much progress has been made in modelling drylands [10, 11, 41] as well as in identifying warning signals [16, 18, 39, 41, 45], feasible strategies to prevent green-desert transitions are currently scarce.

In a recent paper [47] it has been shown that, by tuning some particular features of models exhibiting catastrophic shifts, one can modify their nature and location in parameter spaces. Based on a theoretical approach, the authors suggested that the amount of stochasticity (both demographic and intrinsic) or population dispersal range can play that role. What type of microscopic mechanisms could actually avoid green-desert transitions? In this paper we seek using the insight gathered from models of dryland dynamics to predict the impact of bioengineering strategies on endangered drylands. In this context, several bioremediation approaches have been developed in the last two decades to enhance and stabilise soil biocrusts (for a overview, see [3] and references therein).

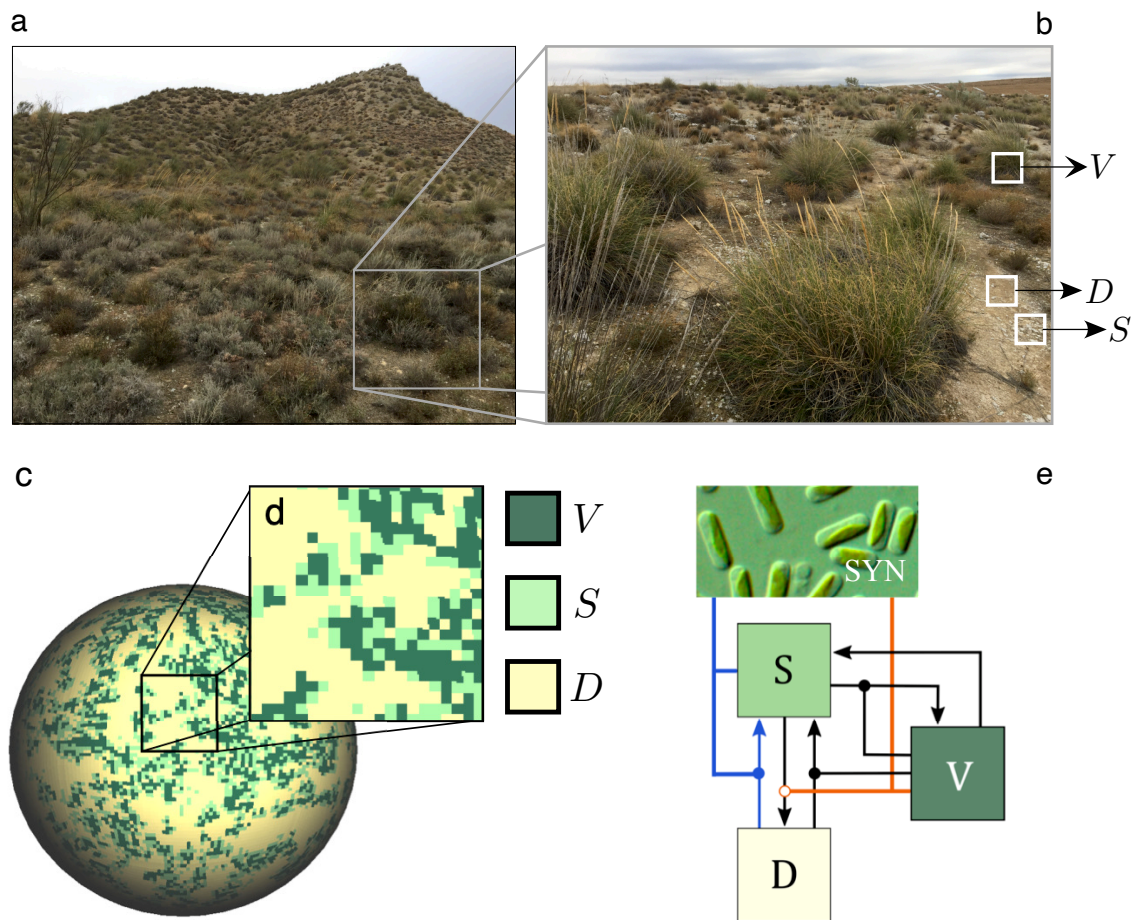

FIG. 1. Complexity and local states in semiarid ecosystems. (a) Example of a semiarid landscape from Aranjuez (central Spain). An enlarged view is shown in (b) showing patches of vegetation, fertile soil with crust and bare soil. These three states allow to define three different classes of patches, namely vegetation ( $V$ ), functional soil (including soil crust,  $S$ ) and bare, desert sites ( $D$ ). (c) A two-dimensional spatial model can be constructed including these patch types, which are highlighted in (d). The local dynamics follows a set of stochastic rules that allow transitions between the three different states, as indicated in (e) using black arrows. Moreover, the presence of vegetation cover has an impact on these transitions, as indicated by the links ending in black circles. These are the basic rules used in previous literature modelling semiarid ecosystems [16, 17, 46]. The proposed scenario about synthetic terraformation of this system considered in this article is indicated using coloured links. The orange line denotes  $C$ -terraformation (a synthetic strain establishing cooperative feedbacks with vegetation), inhibiting the transition from  $S$  to  $D$ ; the blue line indicates  $D$ -terraformation, allowing for increased dispersal of the engineered organisms (SYN) thus favouring the transition from  $D$  to  $S$ .

63 These include a diverse range of approaches addressed to 77  
 64 improve moisture and soil texture, from enrichment of 78  
 65 key nutrients [22] or enrichment of cyanobacteria [28] to 79  
 66 large-scale straw checkerboard barriers used to stabilise 80  
 67 sand dunes [21]. 81

68 More recently, ecosystem *Terraformation* has been sug- 82  
 69 gested as a novel approach against green-desert shifts 83  
 70 [24, 42, 43]. In a nutshell, some existing microorganisms, 84  
 71 such as cyanobacteria from the soil crust, could be mini- 85  
 72 mally modified by means of synthetic biology techniques 86  
 73 to help improving soil moisture and create a cooperative 87  
 74 feedback between vegetation or moss cover (see [13]) and 88  
 75 the soil microbiome [27]. This engineering scenario aims  
 76 at building *synthetic soil* e.g., soil crust, where the un-

derlying community structure incorporates the synthetic  
 strain. By doing so, potential tipping points could be  
 made much more difficult to be achieved [44]. What  
 might be the impact of these strategies on the large-scale,  
 long-term dynamics of semiarid ecosystems? How the  
 introduction or enhancement of ecological interactions  
 (e.g., cooperation and microbes dispersal capacities) can  
 modify the presence of tipping points? As shown below  
 by means of both mathematical and computational mod-  
 els, the engineering of microorganisms present in arid and  
 semiarid soils may easily expand the potential for ecosys-  
 tems' persistence.

## II. MODELLING TERRAFORMATION OF SEMIARID ECOSYSTEMS

In order to predict the impact of synthetic bioengineering strategies in arid and semiarid ecosystems, a spatial model given by a stochastic cellular automaton (CA) is introduced. Let us first consider the microscopic rules associated with the dynamics, as described by a set of transitions among the three defined ecological states. The basic transition diagram is displayed in Fig. 1(c), which includes the three potential states characterising a given patch, namely

$$\Sigma = \{D, S, V\}.$$

These states, as mentioned, are defined by desert ( $D$ ) patches, by fertile soil ( $S$ ) patches occupied by an engineered microorganism with their natural community (e.g., soil crust), and by a vegetated ( $V$ ) state, respectively. This is of course an oversimplification that ignores most of the complexity and diversity involved, but allows for an analysis of the dynamics arising from the most fundamental ecological interactions. The model described here is an extension of the model proposed by Kéfi *et al.* (2007) [17] with an additional extra state associated to patches that are not occupied by plants but by soil crust plus (engineered) microorganisms. As discussed in a previous work [44], we aim at describing how the use of an appropriate synthetic design can help maintaining the stability and resilience of semiarid ecosystems.

The first rule is applied to degraded patches. Transition from degraded to fertile soil containing synthetic strains will take place with a probability:

$$P(D \rightarrow S) = r + f\rho_v + \Gamma(\rho_s).$$

Here, parameter  $r$  is the rate of spontaneous restoration of fertile soil (due to, e.g., increased humidity, accumulation of organic matter, ecosystem's engineers action, etc), and  $f$  is the influence of the surrounding vegetation in helping the transition to occur via a facilitation process. The constant  $\rho_v$  is the local density of vegetation. Finally,  $\Gamma(\rho_s)$  denotes the spreading capacity of the microorganisms associated to their synthetic engineered properties (see below).

The second transition considers the reverse situation, namely a soil-to-desert transition:

$$P(S \rightarrow D) = \varepsilon \Upsilon(\rho_v),$$

where  $\varepsilon$  is the rate of loss of fertile soil due to increased aridity or to other soil degradation processes (for simplicity we will study the range  $0 \leq \varepsilon \leq 1$ ). In this paper we consider (see below) a modification of the degradation rate mediated by a vegetation-dependent function  $\Upsilon(\rho_v)$ . The third rule involves the colonization of available  $S$  patches by vegetation:

$$P(S \rightarrow V) = (\delta\Delta_V + (1 - \delta)\rho_v)(b - c\Delta_V). \quad (1)$$

This term has the same form as the colonisation used in Ref. [17]. Here  $\delta$  is related to seeds dispersal, and the last term in the r.h.s. of Eq. (1) stands for germination rate (balance between seeds that arrives to an unoccupied space that already have soil-crust ( $S$ ), the germination rate and the degradation of seed). The parameter  $\delta$  balances the influence of the local and global vegetation to produce the germination of new plants in a given site. Seeds are produced and germinate at rate  $b$ . However, they can also be degraded during the dispersal travel (at a rate  $c$ ). Finally, a linear decay of vegetated patches to fertile soil occurs following a simple rule:

$$P(V \rightarrow S) = m,$$

where  $m$  is the death rate of the plants, which can occur due to pathogens or the recollection by livestock activity.

Here two different but complementary terraformation strategies are considered and weighted by means of parameters  $\alpha$  and  $\beta$ . Their role within the transition diagram is displayed in Fig. 1(c). They involve:

1. *C*-terraformation: Engineering cooperative loops between vegetation and soil organisms. Here a decreasing function of the vegetation cover, namely

$$\Upsilon(\rho_v) = \frac{1}{1 + \alpha\rho_v},$$

introduces a reduction in the impact of desertification due to increased soil quality favoured by the synthetic microbial population. The efficiency of this term is weighted by the constant  $\alpha$ : large values of  $\alpha$  imply a lower soil degradation rate due to the action of the synthetic microbes which are cooperatively coupled with vegetation at a local scale.

2. *D*-terraformation: Engineering the capacity of microbial spreading (e.g., faster replicative rates of the microbes, increased formation of endospores able to colonise local surroundings). The dispersal is here considered proportional to the term

$$\Gamma(\rho_s) = \beta\rho_s.$$

Here  $\rho_s$  is the local density of fertile soil. In other words, at a rate  $\beta$ , engineered strains improve their dispersal capabilities thus changing the properties of, i.e., desert patches by retaining humidity, depositing organic matter, etc.

Setting  $\alpha$  and  $\beta$  to zero, the CA model recovers the original model introduced by Kéfi *et al.* (2007) [17].

## III. MODELS AND RESULTS

In the next sections we will explore the dynamics tied to the rules described above using both a well-mixed

(mean field) and a discrete spatial setting using a stochastic cellular automaton (CA). The first approach, developed in Section A, employs differential equations to predict the presence of tipping points and changes in their location in the parameter space due to the effects of the addition of a synthetic strain. The second approach, studied in Section B, explicitly deals with a spatially extended population where local interactions take place on a two-dimensional lattice and the set of rules are applied in a probabilistic manner, thus considering stochastic effects. Finally, we provide insights into the nature of the tipping points found in the spatial model, focusing on the early warning signals for the system without and with synthetic engineering, a *Terraformed condition*.

### A. Mean-field model

The differential equations model, including the interactions and processes tied to the bioengineered synthetic strains, can be represented as follows:

$$\frac{dV}{dt} = V((b - cV)S - m), \quad (2)$$

$$\frac{dS}{dt} = (fV + \beta S)D - \varepsilon S \Upsilon - V((b - cV)S - m), \quad (3)$$

$$\frac{dD}{dt} = \varepsilon \Upsilon S - (r + fV + \Gamma)D. \quad (4)$$

Equation (2) contains a logistic term that includes variable  $S$  as a multiplicative term, indicating that plants need viable soil to persist, and an exponential decay proportional to  $m$ . Equation (3) includes the positive effects triggered by vegetation and existing soil cover, as well as negative terms that are in fact symmetric to those present in the previous equation for  $V$ . Equation (4) provides the dynamics of desert patches resulting from desertification recruitment to viable soil patch and an exponential decay from  $S$  to  $D$ .

Since the three classes of patches cover the entire lattice in the spatial model, it is possible to normalise and consider the states as population fractions in the mean-field approach, i. e.  $V(t) + S(t) + D(t) = 1$ . This allows to reduce the three-variables system to a two-variables

one using the linear relation

$$D(t) = 1 - V(t) - S(t), \quad (5)$$

leading to:

$$\frac{dV}{dt} = V((b - cV)S - m), \quad (6)$$

$$\frac{dS}{dt} = (fV + \beta S)(1 - S - V) - \varepsilon S \left( \frac{1}{1 + \alpha V} \right) - V((b - cV)S - m). \quad (7)$$

Under this model reduction, the fraction  $D$  is automatically obtained from Eq. (5) once the fractions of states  $V$  and  $S$  are determined. We must note that Eqs. (6)-(7) have been recently studied in Ref. [46] for the none engineered system (that is taking  $\alpha = \beta = 0$ ).

We are specially interested in those scenarios involving a full dominance of the desert state, focusing in the transitions between states. We have identified four equilibria for Eqs. (6) and (7), two of them implying the extinction of vegetation and another one allowing for the stable coexistence of the three ecological states. The first equilibrium is at the origin, i. e.  $P_1^* = (V = 0, S = 0)$ , where the system becomes a desert ( $D = 1$ ). The second equilibrium, keeps the fertile soil and the desert patches without vegetation, and is given by  $P_2^* = (V = 0, S = 1 - \varepsilon/\beta)$ . This state is interesting from the point of view of the terraformation strategies, since its existence depends on the chosen engineering strategy. If  $\beta = 0$ , when no engineered organisms are found in the soil crust, this equilibrium is not biologically meaningful ( $S(t \rightarrow \infty) = -\infty$ ).

Two more equilibrium points, labeled  $P_3^*$  and  $P_4^*$ , have been identified numerically (see Figs. S1-S4, and Figs. S6-S8 in the *Supplementary Information*). The equilibrium  $P_4^*$  (numerical results suggest it is always stable within the simplex, see below) involves  $V(t \rightarrow \infty) > 0, S(t \rightarrow \infty) > 0$  and  $V(t \rightarrow \infty) + S(t \rightarrow \infty) < 1$ , allowing the coexistence of the three ecological states when is an interior equilibrium.  $P_3^*$  is a saddle point. See below and Figs. S1-S4 for further details on the dynamics of the equilibria on the simplex  $(V, S)$ .

The conditions defining the local stability of each equilibrium can be obtained by means of the eigenvalues of the Jacobian matrix  $\mathcal{J}$ , given, for Eqs. (6) and (7), by:

$$\mathcal{J} = \begin{pmatrix} -m + (b - 2cV)S & V(b - cV) \\ m - f(-1 + 2V + S) + S(-b + 2cV + \varepsilon\alpha(1 + V\alpha)^{-2} - \beta) & -V(b + f - cV) - \varepsilon(1 + V\alpha)^{-1} + \beta - (V + 2S)\beta \end{pmatrix}.$$

The eigenvalues of matrix  $\mathcal{J}$  evaluated at an equilibrium provide its local stability conditions. The stability of equilibria  $P_{1,2}^*$  can be easily computed, while the stability of equilibria  $P_{3,4}^*$  will be characterised numerically. In the case of the desert equilibrium  $P_1^* = (V = 0, S = 0)$ , the eigenvalues are  $\lambda_1 = -m$  and  $\lambda_2 = \beta - \varepsilon$ . Since all the parameters are positive, this equilibrium will be stable

when  $\varepsilon > \beta$ . For  $P_2^* = (0, 1 - \varepsilon/\beta)$ , its eigenvalues are  $\lambda_1 = \varepsilon - \beta$  and  $\lambda_2 = -m + b(1 - \varepsilon/\beta)$ , see Fig. S5 for a stability diagram for  $P_2^*$  in the parameter space  $(\varepsilon, \beta)$ . Note that  $P_1^*$  and  $P_2^*$  suffer a transcritical bifurcation at  $\beta = \varepsilon$ , since the two conditions for this bifurcation are fulfilled: the two fixed points collide at the bifurcation value (at  $\varepsilon = \beta, P_1^* = P_2^* = (0, 0)$ ), and they interchange

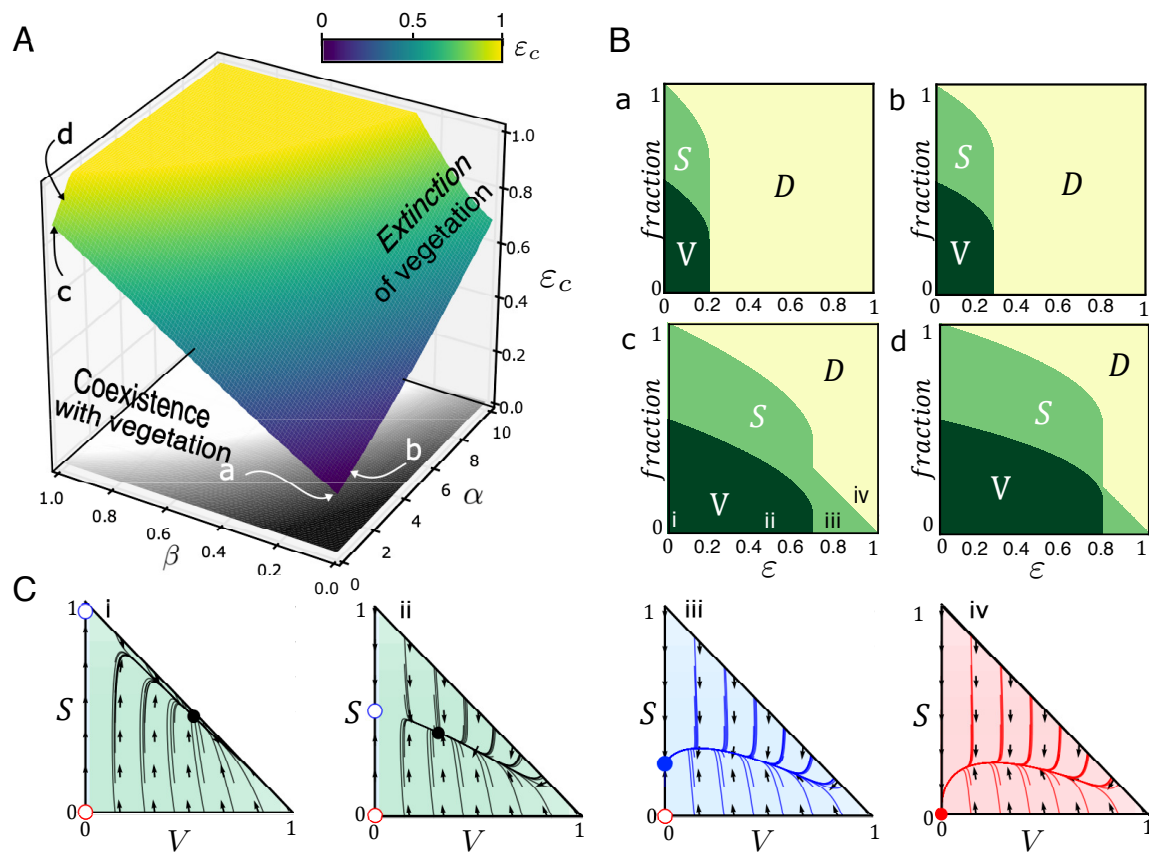

FIG. 2. (A) Critical degradation rate of fertile soil ( $\epsilon_c$ ) computed in the parameter space of engineering strategies ( $\alpha, \beta$ ) from Eqs. (6)-(7). The inner surface separates the values of  $\epsilon$  allowing for the presence of vegetation. The yellow area indicates those pairs of  $\alpha$  and  $\beta$  giving  $\epsilon_c \geq 1$  (those values of  $\epsilon_c > 1$  are set to  $\epsilon_c = 1$ ). (B) Fraction of the states at equilibrium increasing  $\epsilon_c$  and using a full vegetated system as initial conditions  $V(0) = 1, S(0) = D(0) = 0$ . Panel (a) shows results for a non-engineered ecosystem ( $\alpha = \beta = 0$ ), and panel (b) for the engineered ecosystem incorporating cooperation loops ( $\alpha = 1$  and  $\beta = 0$ ). Finally, panels (c) and (d) display, respectively, the results engineering the resilience of the soil crust ( $\alpha = 0$  and  $\beta = 1$ ) and both strategies ( $\alpha = \beta = 1$ ). (C) Phase portraits for the case  $\alpha = 0$  and  $\beta = 1$ , with: (i)  $\epsilon = 0.0$ ; (ii)  $\epsilon = 0.2$ ; (iii)  $\epsilon = 0.6$ ; and (iv)  $\epsilon = 0.9$ . The circles indicate the fixed points (stable: solid; unstable: open). We note that in the phase portraits (i) and (ii) there exists an interior saddle (see Figs. S1-S4 for the identification of the nullclines and dynamics). Green, blue, and red regions of the phase portraits denote the equilibrium states of  $V$ - $S$  coexistence,  $S$ - $D$  coexistence, and full desert, respectively. The other parameters are  $r = 0, f = 0.9, \delta = 0.1, b = 0.6, c = 0.3$ , and  $m = 0.15$ .

249 the stability.

250 Figure 2 displays the critical degradation rate of the  
 251 fertile soil,  $\epsilon_c$ , computed numerically in the parameter  
 252 space ( $\alpha, \beta$ ), separating two domains with and without  
 253 vegetation at equilibrium. The value of  $\epsilon_c$  moves to  
 254 higher values as either  $\alpha$  or  $\beta$  are increased. The yellow  
 255 region in the surface of  $\epsilon_c$  in Fig. 2(A) denotes those  
 256 values of  $\alpha$  and  $\beta$  where  $\epsilon_c \geq 1$  (although they are all set  
 257 to  $\epsilon_c = 1$ ). This region denotes that no critical degrada-  
 258 tion is achieved under the chosen parameter values and  
 259 under the restriction  $0 \leq \epsilon \leq 1$ . The four panels in  
 260 Fig. 2(B) (corresponding to the values of  $\alpha$  and  $\beta$  indi-  
 261 cated in Fig. 2(A)) provide a more detailed picture of the  
 262 changes in the fraction of the states due to both  $C$ - and  
 263  $D$ -terraformation strategies. Panel (a) shows how the  
 264 states change without terraformation ( $\alpha = \beta = 0$ ) at in-  
 265 creasing  $\epsilon$ . Note that for  $\epsilon > 0.2$  the desert state becomes

266 dominant. This critical degradation rate is displaced to  
 267 larger values for the terraformed system, meaning that  
 268 the ecosystem becomes much more resistant to soil degrada-  
 269 tion. More specifically,  $\epsilon_c \approx 0.3$  when applying the  
 270  $C$ -terraformation strategy (panel (b) in Fig. 2(B)). This  
 271 effect is further amplified for the  $D$ -terraformation, re-  
 272 sulting in  $\epsilon_c \approx 0.7$  (see panel (c) in Fig. 2(B)). The com-  
 273 bination of both terraformation strategies (see Fig. 2(B)  
 274 panel (d)) further increases the size of non-desert phases,  
 275 here with  $\epsilon_c \approx 0.8$ . In both cases (specially for  $D$ -  
 276 terraformation), the domain of fertile soil is increased due  
 277 to the presence of the synthetic strains (Figs. S6, S7 and  
 278 S8 show how the values of  $\epsilon_c$  are displaced for different  
 279 intensities of the proposed terraformation strategies).

The dynamics tied to increases of soil degradation rate  
 are summarised in Fig. 2(C) (see also Figs. S1-S4), where  
 different phase portraits are displayed for the values of  $\epsilon$

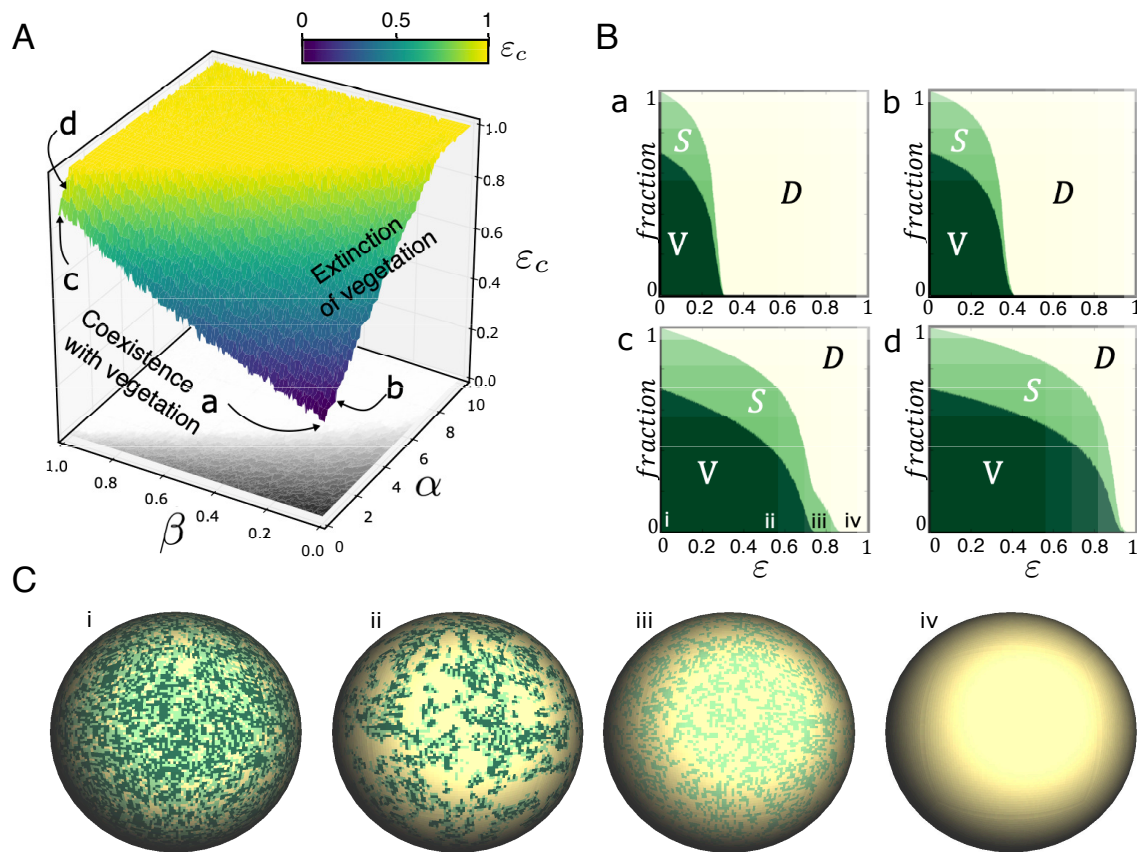

FIG. 3. Same as in Fig. 2 for the spatial model. Vegetation extinction surface depending on the engineering strategies and the rate of fertile soil degradation ( $\epsilon$ ). The yellow region indicates that vegetation extinction can not be achieved because  $\epsilon = 1$ . (B) Bifurcation diagrams depending on the engineering strategies ( $\alpha$ ,  $\beta$ ) and the degradation parameter  $\epsilon$ . (a) Non-engineered ecosystem ( $\alpha = \beta = 0$ ), (b) engineering of cooperative loops between synthetic microorganisms and the vegetation ( $\alpha = 1$  and  $\beta = 0$ ), (c) engineering resilience of the soil crust ( $\alpha = 0$  and  $\beta = 1$ ); and (d) engineering both terraformation strategies ( $\alpha = \beta = 1$ ). The other probabilities are fixed using the same values of the parameters from Fig. 3. In all of the analyses the initial condition used is  $V(0) = 1$ . All these results have been obtained using a lattice with  $200 \times 200$  sites.

indicated in 2(B) panel (c) (from (i) to (iv)). The transition from the coexistence of vegetation and fertile soil to no vegetation is catastrophic, and is due to a saddle-node bifurcation between fixed points  $P_3^*$  and  $P_4^*$  (transition between phase portraits (ii) and (iii), see also Figs. S1-S4). Once this bifurcation takes place, the only stable point is  $P_2^*$  (with fertile soil and desert areas). Then, further increase of  $\epsilon$  involves the transcritical bifurcation previously mentioned, after which the origin becomes globally stable and the desert becomes the only possible state (transitions between phase portraits (iii) and (iv) of Fig. 2(C)), see also Fig. S7 where the transcritical bifurcation is shown.

Finally, Fig. S6 provides one-dimensional bifurcation diagrams tied to the increase of  $\epsilon$  for the non-terraformed system and the three possible terraformation strategies ( $C$ -,  $D$ -, and  $(C, D)$ - terraformation). Here we want to emphasise the presence of so-called delayed transitions (also called ghosts), which arise just after a saddle-node bifurcation takes place [20]. This is a dynamical phe-

nomenon that involves extremely long transients once the bifurcations has occurred, and the time trajectories experience a long bottleneck before rapidly achieving, in Eqs. (6)-(7), another attractor (e.g., the full desert state in Fig. S6(a)-(b)). These transients are typically found in systems with strong feedbacks e.g., cooperation, such as catalytic hypercycles (see e.g., [32, 33]) or metapopulations with facilitation [41]. Also, this dynamical delay tied to saddle-node bifurcations has been recently described in both deterministic and stochastic well-mixed approaches for the non-terraformed system explored in this article (see [46] for more details).

## B. Spatial stochastic model

The mean field model studied in the previous section provides a first approximation to understand the qualitative dynamics arising from the nonlinear interactions of the studied system and the resulting tipping points, especially when including the proposed terraformation

strategies. However, in order to test its robustness in a more ecologically-realistic setting, one has to take into account both local spatial correlations and stochastic effects. To do so, we build a spatially-explicit simulation model given by a stochastic cellular automaton (CA). The CA incorporates the previously studied states ( $V$ ,  $S$ ,  $D$ ) and their transitions, which are now probabilistic. Spatial degrees of freedom are introduced by using a  $\mathcal{L} \times \mathcal{L}$  square lattice with periodic boundary conditions. At each time step, the following four transition probabilities defining the rate of change for each site  $k$  of the lattice (see Fig. 1) are applied in an asynchronous manner:

$$\begin{aligned}
 P(D_k \rightarrow S_k) &= r + f \frac{1}{\mathcal{M}_k} \sum_{\mu \in \mathcal{M}_k} V_\mu + \beta \frac{1}{\mathcal{M}_k} \sum_{\mu \in \mathcal{M}_k} S_\mu, \\
 P(S_k \rightarrow D_k) &= \frac{d}{1 + \frac{\alpha}{\mathcal{M}_k} \sum_{\mu \in \mathcal{M}_k} V_\mu}, \\
 P(S_k \rightarrow V_k) &= \left( \frac{\delta}{\mathcal{L}^2} \sum_{\mu \in \Omega} V_\mu + \frac{(1-\delta)}{\mathcal{M}_k} \sum_{\mu \in \mathcal{M}_k} V_\mu \right) \times \\
 &\quad \left( \frac{b-c}{\mathcal{L}^2 \sum_{\mu \in \Omega} V_\mu} \right), \\
 P(V_k \rightarrow S_k) &= m.
 \end{aligned}$$

Here,  $\mathcal{M}_k$  is the neighbourhood of site  $k$  and  $\mathcal{M}_k = 8$  the number of neighbour (using a Moore neighborhood). The nature of local interactions is known to largely influence ecological dynamics. This is particularly important in drylands, where carbon and water limitation deeply constrains the outcome of nonlinear exchanges, leading to spatial patterning. Also, facilitation processes (involving strong nonlinearities) are known to introduce important changes in spatial systems, as compared to well-mixed ones. In this sense, recent research has found a shift from catastrophic tipping points to continuous ones due to local spatial processes [41, 47].

Similar analyses to those presented in Fig. 2 for the mean field model are displayed in Fig. 3 for the CA simulations. For the sake of comparison we have kept the same parameter values of the mean field model, implemented as probabilities in the CA, also using as initial conditions a full vegetated lattice. The critical surface separating the parameter scenarios allowing the persistence of vegetation are displayed in Fig. 3(A). Below the surface,  $V$  persists while above the surface it is only possible to find states  $S$  and  $D$ . Here, similarly to the mean field model, the yellow region indicates those values of  $\alpha$  and  $\beta$  for which no critical degradation rate of the fertile soil is found (i.e.,  $\varepsilon_c = 1$ ). Note that the surface for the spatial system differs from the one obtained with the mean field model. This effect, taking into account that the lattice has  $4 \times 10^4$  sites (large system size), is probably introduced by space more than by stochasticity. This change of the surface is especially visible for parameter  $\alpha$ . This may be explained because soil degradation rate ( $\varepsilon$ ) makes the vegetation to decrease globally, but due to the local interactions of facilitation [48], plants remain in the ecosystem for larger rates of soil degradation.

The fraction of the three states computed at increasing  $\varepsilon$  is displayed in Fig. 3(B). All diagrams (a-d) display the same phenomenon: the introduction of spatial correlations shifts the extinction of the vegetation to larger values of  $\varepsilon$ . Consistently with mean field results, both the  $C$ - and  $D$ -terraformation displace the value of  $\varepsilon_c$  to larger values, being the  $(C, D)$ -terraformation strategy much more efficient in doing so under the selected parameters. The spheres displayed in Fig. 3(C) show the spatial patterns at equilibrium for the regions labeled in panel (c) of Fig. 3(B), with: (i-ii) coexistence of the three states; (iii) only fertile soil and desert patches; and (iv) the full desert scenario.

In order to identify the nature of the transitions tied to the increase of  $\varepsilon$ , we have computed the stationary values of the fraction of areas with vegetation and fertile soil. We recall that both mean field and well-mixed stochastic simulations for the system without terraformation revealed a catastrophic transition and delayed transitions due to a ghost [46]. Also, the mean field model studied in Section III A have revealed the presence of saddle-node bifurcations responsible of vegetation extinctions. Figure S9 shows these results together with the spatial patterns on the square lattice and time series. Specifically, Fig. S9(a) shows results increasing  $\varepsilon$  for the system without terraformation. For this case  $\varepsilon_c \approx 0.24$ . The same results are displayed by setting  $\alpha = \beta = 1$ , for which the critical degradation moves to  $\varepsilon_c \approx 0.85$ . For both cases, the discontinuity of the transition is not so evident as in the mean field model, even looking like a continuous one.

To identify the transition governing vegetation extinction we have used an indirect method analysing the properties of the dynamics close to the transition value. The results displayed in Fig. S10 indicate the presence of bottlenecking phenomena tied to the extinction of the vegetation, meaning that the transition is governed by a saddle-node bifurcation. We must notice that we have used a lattice of side size  $\mathcal{L} = 50$  for these analyses due to the huge computational cost of computing extinction transients in large spatial systems. Figure S10(a) shows the transition for the non-engineered system. Specifically, panel (a.1) displays 5 realisations obtained with  $\varepsilon = 0.26$ , and the bottleneck region can be clearly seen (see Fig. S6 for comparison with the mean field bottlenecks). The delaying effect of the ghost can also be seen in panels (a.2), (a.3) and (a.4), which indicate the values at which vegetation spends longer iterates before achieving the full desert state. The same results are shown for the system with  $(C, D)$ -terraformation. Here, the extinction dynamics of the vegetation (investigated setting  $\varepsilon = 0.86$ ) is also given by a clear bottleneck. Previous research in catalytic hypercycles also revealed extinctions due to saddle-node bifurcations and the corresponding bottlenecking phenomena in a CA model [33].

As discussed above, the approach to tipping points is often associated to a qualitative change in the nature of the fluctuations exhibited by the system. How will our model behave when dealing with an extra phase associ-

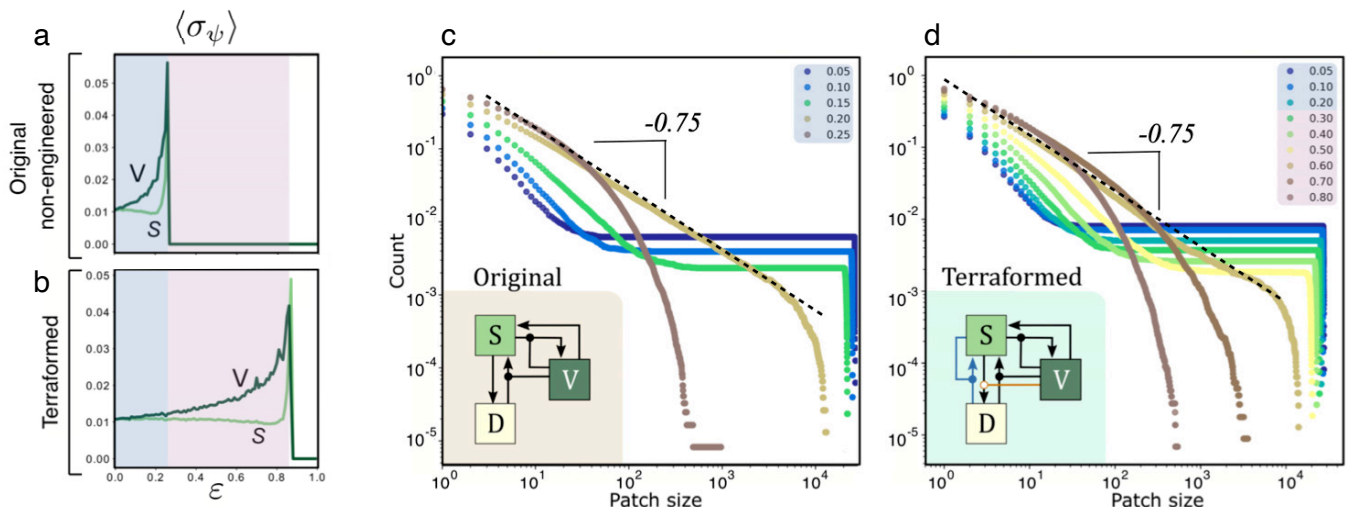

FIG. 4. Warning signals for the non-engineered ( $\alpha = \beta = 0$ ) and terraformed ( $\alpha = 1$  and  $\beta = 1$ ) ecosystems taking vegetation and fertile soil as indicators at increasing  $\varepsilon$ . Panels (a-b) display the standard deviation  $\langle \sigma_{\psi=V,S} \rangle$  of the population fluctuations for the original and the terraformation scenarios, corresponding to the simulations shown in Fig. S9. Values of  $\langle \sigma_{\psi} \rangle$  have been obtained from the last  $10^3$  values from time series with  $10^6$  iterations. In (c-d) the cumulative distributions of patch sizes are displayed for different values of  $\varepsilon$  (indicated by the different colours inside the plots). The patch size distributions have been computed using 100 replicas from a lattice with  $200 \times 200$  sites.

ated to vegetation-free, synthetic soil crust? A divergence  
in a stochastic dynamical system can be detected by us-  
ing standard deviation measures. We have used several  
measures that can detect the approach to criticality in  
both the non-manipulated and the terraformed scenarios  
(spatial variance and distribution of patch sizes). The  
spatial variance  $\sigma_{\psi}$ , with  $\psi$  referring to either  $V$  or  $S$ , is  
determined from

$$\langle \sigma_{\psi} \rangle = \left( \frac{1}{\mathcal{L}^2} \sum_k^{\mathcal{L}^2} (\psi(k,t) - \langle \psi(t) \rangle)^2 \right)^{1/2} \quad (8)$$

where we have used the mean over the entire lattice, given  
by

$$\langle \psi(t) \rangle = \frac{1}{\mathcal{L}^2} \sum_k^{\mathcal{L}^2} \psi(k,t). \quad (9)$$

The fluctuations diverge in a characteristic fashion  
(Fig. (4)(a,b)): whereas  $\langle \sigma_V \rangle$  slowly grows and accel-  
erates close to criticality, the same measure for  $\langle \sigma_S \rangle$  dis-  
plays a slight decline only growing very quickly close to  
 $\varepsilon_c$ . Despite these trends, both variables exhibit high fluc-  
tuations close to the transition to the desert state.

An additional confirmation of the criticality associated  
to the transition to the desert state is obtained by deter-  
mining the distribution of vegetation cluster sizes. In  
a nutshell, criticality is known to be linked to power  
law distributions of connected clusters. On particular  
instance of these scaling behavior was found in [17]. Clus-  
ters of size  $S$  are composed by a set of  $S$  connected sites  
(i. e. sharing the same state and all elements in contact  
with another as nearest neighbors).

The number of clusters of a given size and their dis-  
tributions have been obtained using a burning algo-  
rithm [12]. If  $P(S)$  indicates the probability of finding  
a cluster of size  $S$ , most measured patch size distribu-  
tions found in arid and semiarid habitats follow a gen-  
eral form described as a truncated power law, namely  
 $P(S) \sim S^{-\tau} \exp(-S/S_c)$ . This defines a power-law de-  
cay with an exponent  $\tau$  that characterises the class of  
phenomenon underlying the dynamics [25] and an upper  
limit introduced by a cut-off  $S_c$  in the exponential de-  
cay term. Close to critical transitions we should expect  
a fat-tailed decay in  $P(S)$  following the power law form  
 $P(S) \sim S^{-\tau}$  (when no characteristic scale is present, i.  
e. for  $S_c \rightarrow \infty$ ). Instead, far below the transition point,  
the exponential term dominates and a characteristic scale  
is observed. In order to improve the smoothness of the  
distribution, the so called *cumulative* distribution  $P_{>}(S)$   
will be used, and is given by

$$P_{>}(S) = \int_{S_0}^{S_m} P(S) dS, \quad (10)$$

where  $S_0$  and  $S_m$  indicate the smallest (the one-site scale)  
and largest (lattice) sizes. At criticality, the cumulative  
form scales as a power law

$$P_{>}(S) \sim S^{-\tau+1} \quad (11)$$

In our model, the shapes of the distributions change at  
increasing values of  $\varepsilon$ : from single-scaled to scale-free, as  
shown in Fig. 4(c) (original model) and Fig. 4(d) (ter-  
raformed). In both cases the same pattern is found, but  
the power-law behavior is observed at much higher levels  
of soil degradation. Interestingly, the scaling exponent



478 for both cases is the same:  $\tau \approx 1.75$ , in agreement with<sup>531</sup>  
479 the results reported in [16]. The consideration of the<sup>532</sup>  
480 extra processes tied to terraformation do not alter a uni-<sup>533</sup>  
481 versal behaviour pattern, thus suggesting that, despite<sup>534</sup>  
482 the parameter shift in  $\varepsilon_c$ , the warning signals associated<sup>535</sup>  
483 to both scenarios will behave in a very similar way. <sup>536</sup>

#### 484 IV. DISCUSSION <sup>537</sup> <sup>538</sup> <sup>539</sup> <sup>540</sup> <sup>541</sup>

485 The impact of anthropogenic-driven processes is<sup>542</sup>  
486 rapidly increasing, leading to a degradation of extant<sup>543</sup>  
487 ecosystems and in many cases pushing them closer to<sup>544</sup>  
488 viability thresholds [1, 2, 14, 34]. In the case of semi-<sup>545</sup>  
489 arid ecosystems, this degradation is produced mostly by<sup>546</sup>  
490 global warming and intensive grazing [15]. The increasing<sup>547</sup>  
491 pressure could end up in catastrophic transitions that are<sup>548</sup>  
492 essentially irreversible. It is expected that the expansion<sup>549</sup>  
493 of arid areas will increase in the next decades, with an as-<sup>550</sup>  
494 sociated increase in the likelihood of green-desert tipping<sup>551</sup>  
495 points. Under this potential scenario, it is important to<sup>552</sup>  
496 develop strategies of intervention aimed at avoiding these<sup>553</sup>  
497 transitions. <sup>554</sup>

498 Theoretical results on the nature and location of these  
499 shifts suggest that some generic factors (such as noise<sup>555</sup>  
500 and dispersal) [41, 47] could be crucial. Can realistic in-<sup>556</sup>  
501 terventions help preventing green-desert transitions? As<sup>557</sup>  
502 discussed above, several bioremediation strategies to face<sup>558</sup>  
503 this problem have been proposed. Some recent propos-<sup>559</sup>  
504 als suggest how to exploit nonlinear features of tipping<sup>560</sup>  
505 points based on periodic replanting [46]. More recently,<sup>561</sup>  
506 an engineering approach based on synthetic biology has<sup>562</sup>  
507 also been suggested [42–44]. In this article we investigate<sup>563</sup>  
508 this latest approach for arid and semiarid ecosystems em-<sup>564</sup>  
509 ploying both mathematical and computational models. <sup>565</sup>

510 Beyond the standard vegetated-desert model, in our<sup>566</sup>  
511 study, we pay attention to the possibility that an engi-<sup>567</sup>  
512 neered soil crust (a "synthetic" soil) might have on the<sup>568</sup>  
513 phase space of potential ecosystem-level states. The orig-<sup>569</sup>  
514 inal motivation is to describe, using a toy model, the<sup>570</sup>  
515 impact two different but complementary strategies: the<sup>571</sup>  
516 so-called *C*-terraformation using a designed cooperative<sup>572</sup>  
517 loop (promoted by a designed microbial strain); and the<sup>573</sup>  
518 *D*-terraformation, consisting on engineered strains with<sup>574</sup>  
519 increased dispersal capacities. We are especially inter-<sup>575</sup>  
520 ested in the impact of these two synthetic terraforma-<sup>576</sup>  
521 tion strategies on the location and behaviour of tipping<sup>577</sup>  
522 points. <sup>578</sup>

523 Both terraformation strategies are shown to increase<sup>579</sup>  
524 the resistance to soil degradation, pushing the tipping  
525 points to higher (or even much higher) critical degrada-<sup>580</sup>  
526 tion rates ( $\varepsilon_c$ ). This is consistently predicted by both<sup>581</sup>  
527 mean-field and spatial models. However, when space is<sup>582</sup>  
528 explicitly included, the parameter space supporting this<sup>583</sup>  
529 protection against catastrophic shifts is much larger, with<sup>584</sup>  
530 a fluctuation dynamics (and underlying warning signals)<sup>585</sup>

that behave similar between the non-engineered and the  
engineered systems i.e., they show the same universality  
pattern.

Our theoretical predictions are limited by the simpli-  
fying assumptions that define our model. In particular,  
the description of soils ignores their development, spatial  
organisation or diversity. These are multi-species com-  
munities, describable as complex networks [26]. These  
webs are known to display their own critical thresholds  
and thus it remains open how such diverse communities  
may impact the results reported here. However, despite  
all these limitations, it is important to highlight that pre-  
vious models of vegetation dynamics in drylands have  
been very successful in providing deep insight into their  
natural counterparts [18]. Some key universal proper-  
ties might pervade the success of these models. In our  
context, this is likely to be related to the general pat-  
terns found close to phase transitions. Additionally, the  
terraformation scheme described here is likely to be ef-  
fective when the cooperative interaction helps creating  
the proper ecosystem engineering effect. By engineer-  
ing ecosystem engineers, endangered arid and semiarid  
habitats might get protected (at least temporarily) from  
sudden collapse.

**Ethics:** N/A.

**Data access:** This article has no additional data.

**Author contributions:** All authors built and  
analyzed the mathematical models. All authors wrote  
the paper and gave final approval for publication.

**Competing interest:** Authors have no competing  
interests.

**Funding:** This study was supported by an European  
Research Council Advanced Grant (SYNCOM), by the  
Botin Foundation (Banco Santander through its San-  
tander Universities Global Division), the PR01018-EC-  
H2020-FET-Open MADONNA project, by the FIS2015-  
67616-P grant, and by the Santa Fe Institute. This  
work has also counted with the support of Secretaria  
d'Universitats i Recerca del Departament d'Economia i  
Coneixement de la Generalitat de Catalunya. JS has  
been funded by a "Ramón y Cajal" contract RYC-2017-  
22243, and by the MINECO grant MTM2015-71509-C2-  
1-R and the Spain's "Agencia Estatal de Investigación"  
grant RTI2018-098322-B-I00, as well as by the CERCA  
Programme of the Generalitat de Catalunya.

**Acknowledgements:** The authors specially thank  
Sergi Valverde for the spatial rendering software with  
the cellular automata. We also thank Nuria Conde,  
Fernando Maestre and Miguel Berdugo for helpful  
discussions.

- [1] Barnosky, A.D., et al., 2011. Have the Earth's sixth mass extinction already arrived? *Nature* **471**, 51-57.
- [2] Barnosky, A.D., et al., 2012. Approaching a state of shift in Earth's biosphere. *Nature* **486**, 52-58.
- [3] Belnap, J., Lange, O. L., (eds) 2003 *Biological soil crusts: Structure, function and management*. Springer, Berlin.
- [4] Berdugo, M., Kéfi, S., Soliveres, S., & Maestre, F. T. (2017). Plant spatial patterns identify alternative ecosystem multifunctionality states in global drylands. *Nature ecology & evolution*, **1**(2), 0003.
- [5] Berdugo, M., Soliveres, S., Kéfi, S., & Maestre, F. T. (2018). The interplay between facilitation and habitat type drives spatial vegetation patterns in global drylands. *Ecography*, **1**-13. <https://doi.org/10.1111/ecog.03795>
- [6] Booth, W. E. (1941). Algae As Pioneers in Plant Succession and Their Importance in Erosion Control. *Ecology*, **22**(1), 38-46. <https://doi.org/10.2307/1930007>
- [7] Bronstein, J. L. The evolution of facilitation and mutualism. *J. Ecol.* **97**, 1160-1170 (2009).
- [8] Brooker RW, Maestre FT, Callaway RM et al. (2008) Facilitation in plant communities, the past, the present, and the future. *J. Ecol.* **96**, 18-34
- [9] Callaway, R. M., and Pugnaire, F. I., 1999: Facilitation in plant communities. In Pugnaire, F. I., and Valladares, F. (eds.), *Handbook of functional plant ecology*. Marcel Dekker, 623-648.
- [10] D'Odorico, P. and Porporato, A. (Eds.) 2006. *Dryland ecohydrology*. Dordrecht: Springer.
- [11] D'Odorico, P., Okin, G.S. and Bestelmeyer, B.T., 2012. A synthetic review of feedbacks and drivers of shrub encroachment in arid grasslands. *Ecohydrology* **5**, 520-530.
- [12] Christensen, K. and Moloney, N.R., 2005. *Complexity and criticality (Vol. 1)*. World Scientific Publishing Company.
- [13] Delgado-Baquerizo, M., Maestre, F. T., Eldridge, D. J., Bowker, M. A., Jeffries, T. C., & Singh, B. K. (2018). Biocrust-forming mosses mitigate the impact of aridity on soil microbial communities in drylands: observational evidence from three continents. *New Phytologist*, **220**(3), 824-835. <https://doi.org/10.1111/nph.15120>
- [14] Ellis, E.C., Kaplan, J.O., Fuller, D.Q. et al., 2013. Used planet: A global history. *Proc. Natl. Acad. Sci. U.S.A.* **110**, 7978-7985.
- [15] Foley, J. A., Coe, M. T., Scheffer, M., & Wang, G., 2003. Regime shifts in the Sahara and Sahel: interactions between ecological and climatic systems in Northern Africa. *Ecosystems*, **6**(6), 524-532.
- [16] Kéfi, S. et al., 2007 Spatial vegetation patterns and imminent desertification in Mediterranean arid ecosystems. *Nature* **449**, 213-217.
- [17] Kéfi, S., Rietkerk, M., van Baalen, M., & Loreau, M. (2007). Local facilitation, bistability and transitions in arid ecosystems. *Theoretical Population Biology*, **71**(3), 367-379.
- [18] Kéfi, S., Guttal, V., Brock, W. A., Carpenter, S. R., Ellison, A. M., Livina, V. N., ... Dakos, V. (2014). Early warning signals of ecological transitions: Methods for spatial patterns. *PLoS ONE*, **9**(3). <https://doi.org/10.1371/journal.pone.0092097>
- [19] Klausmeier, C.A., 1999. Regular and Irregular Patterns in semi-arid Vegetation. *Science*, **284**(5421), 1826-1828.
- [20] Strogatz, S.H. 2000. *Nonlinear dynamics and chaos*. Westview Press.
- [21] Li, X. R., Xiao, H. L., He, M. Z., & Zhang, J. G. (2006). Sand barriers of straw checkerboards for habitat restoration in extremely arid desert regions. *Ecological Engineering*, **28**(2), 149-157.
- [22] Maestre, F. T., Martin, N., Diez, B. et al., 2006. Watering, fertilization, and slurry inoculation promote recovery of biological crust function in degraded soils. *Microbial Ecology* **52**, 365-377.
- [23] Maestre, F.T., Eldridge, D.J., Soliveres, S., Kfi, S. et al. 2016. Structure and functioning of dryland ecosystems in a changing world. *Annu. Rev. Ecol. Evol. and Syst.* **47**, 215-237.
- [24] Maestre, F. T., Solé, R., Singh, B.K., 2017. Microbial biotechnology as a tool to restore degraded drylands. *Microb. Biotech.* **10**, 1250-1253.
- [25] Marro, J. and Dickman, R. 1999. *Nonequilibrium Phase Transitions in Lattice Models*. Cambridge U. Press.
- [26] Montoya, J.M., Pimm, S.L. and Solé, R., 2006. Ecological networks and their fragility. *Nature*, **442**, 259-264.
- [27] Park, C., Li, X., Jia, R.L., Vur, J-S., 2015. Effects of superabsorbent polymer on cyanobacterial biological soil crust formation in laboratory. *Arid Land Research and Management* **29**, 5571.
- [28] Park, C., Li, X., Zhao, Y., Jia, R.L., Vur, J-S., 2017. Rapid development of cyanobacterial crust in the field for combating desertification. *PLoS ONE* **12**(6), e0179903.
- [29] Pointing, S.B., Belnap, J., 2012. Microbial colonization and controls in dryland ecosystems. *Nature Rev Microbiol* **10**, 551-562.
- [30] Porporato, A., D'Odorico, P., Laio, F., Ridolfi, L., and Rodriguez-Iturbe, I., 2002. Ecohydrology of water-controlled ecosystems. *Adv. Water Res.* **25**, 1335-1348.
- [31] Reynolds, J.F., Smith, D.M., Lambin, E.F., Turner, II B.L., Mortimore, M., Batterbury, S.P., Downing, T.E., Dowlatabadi, V., Fernández, R.J., Verrick, J.E., Vuber-Sannwald, E., Jiang, V., Leemans, R., Lynam, T., Maestre, F.T., Ayarza, M., Walker B., 2007. Global Desertification: Building a Science for Dryland Development. *Science* **316**, 847-851.
- [32] Sardanyés, J., Solé, R.V. 2006. Ghosts in the origins of life? *Int. J. Bifurc. and Chaos* Vol. **16**(09), 2761-2765
- [33] Sardanyés, J., Solé, R.V. 2006. Bifurcations and phase transitions in spatially-extended two-member hypercycles. *J Theor Biol.* **243**(4):468-82
- [34] Rockström, J., et al., 2009. A safe operating space for humanity. *Nature* **461**, 472-475.
- [35] Rothman, D.V., 2017. Thresholds of catastrophe in the earth system. *Sci. Ad.* **3**, e1700906.
- [36] Rubio, A. & Escudero, A. Small-scale spatial soil-plant relationship in semi-arid gypsum environments. *Plant Soil* **220**, 139-150 (2000).
- [37] Scheffer, M. and Jeppesen, E., 2007. Regime Shifts in Shallow Lakes. *Ecosystems* **10**, 1-3.
- [38] Scheffer, M., 2009. *Critical transitions in nature and society* (Princeton U. Press, Princeton)
- [39] Scheffer, M., Bascompte, J., Brock, W. A., Brovkin, V., Carpenter, S. R., Dakos, V., ... & Sugihara, G. (2009). Early-warning signals for critical transitions. *Nature*, **461**(7260), 53.

- 708 [40] Sardanyés J., Duarte J., Januário C., Martins N., Con-724  
709 trolling delayed transitions with applications to prevent725  
710 single species extinctions. *Adv. Diff. Eq. Control Proc.*726  
711 10(1): 29-41 (2012) 727
- 712 [41] Sardanyés, J., Piñero, J., Solé. 2019. Habitat loss-induced728  
713 tipping points in metapopulations with facilitation. *Pop-729*  
714 ulation Ecology 61(4), 436-449 730
- 715 [42] Solé, R. 2015., *Bioengineering the biosphere? Ecol. Com-731*  
716 plexity 22, 40-49. 732
- 717 [43] Solé, R., Montañez, R., Duran-Nebreda, S., 2015. *Syn-733*  
718 thetic circuit designs for earth terraformation. *Biol. Di-734*  
719 rect 10, 37. 735
- 720 [44] Solé, R. V., Montañez, R., Duran-Nebreda, S.,736  
721 Rodríguez-Amor, D., Vidiella, B., & Sardanyés, J.737  
722 (2018). Population dynamics of synthetic Terraformation  
723 motifs. *Royal Society Open science*, 5(7), 180121.
- [45] Sommer, S., van Benthem, K. J., Fontaneto, D., & Ozgul, A. (2017). Are generic early-warning signals reliable indicators of population collapse in rotifers?. *Hydrobiologia*, 796(1), 111-120.
- [46] Vidiella, Blai, Josep Sardanyés, and Ricard Solé. Exploiting delayed transitions to sustain semiarid ecosystems after catastrophic shifts. *Journal of The Royal Society Interface* 15.143 (2018): 20180083.
- [47] Villa Martín, P. V., Bonachela, J. A., Levin, S. A., & Muñoz, M. A. (2015). Eluding catastrophic shifts. *Proc. Natl. Acad. Sci. U.S.A.*, 112( 15), E1828-E1836.
- [48] Zélé, F., Magalhães, S., Kéfi, S., & Duncan, A. B. (2018). Ecology and evolution of facilitation among symbionts. *Nature Communications*, 9(1), 4869.
